# Supplementary material for: Zinc regulates iNOS-derived nitric oxide formation in endothelial cells
Source: PubMed Central journal article supplement — Redox Biol. 2014 Jul 16;2:945–54. doi: 10.1016/j.redox.2014.06.011 (PMC4143817; doi:10.1016/j.redox.2014.06.011), 2014-07-16
Supplement: mmc1.pdf [file mmc1.pdf]

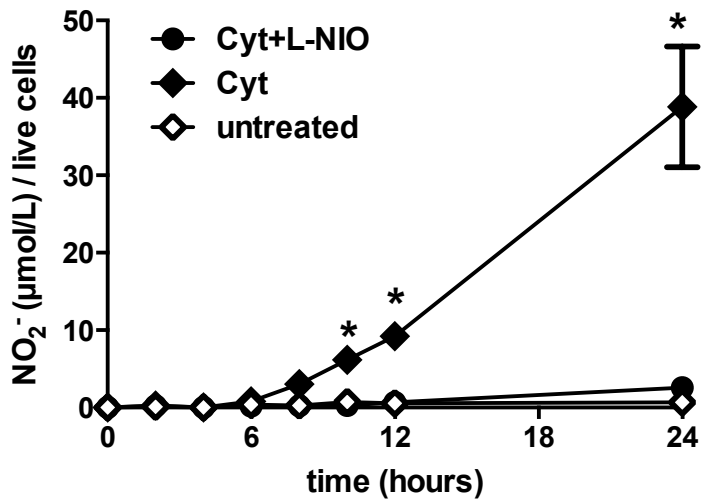

**Supplemental Fig.1. Time-dependent increase in NOS-dependent nitrite accumulation in cytokine-treated cells as assessed by the Griess assay. ANOVA  $p < 0.001$ . \*  $p < 0.05$  vs. untreated.**
